# Supplementary material for: Poly(amine) biphenyl derivatives as fluorescent sensors for anions and cations
Source: Royal Society of Chemistry journal article supplement (doi:10.1039/b418022d), 2005-01-01
Supplement: b418022d.pdf [file b418022d.pdf]

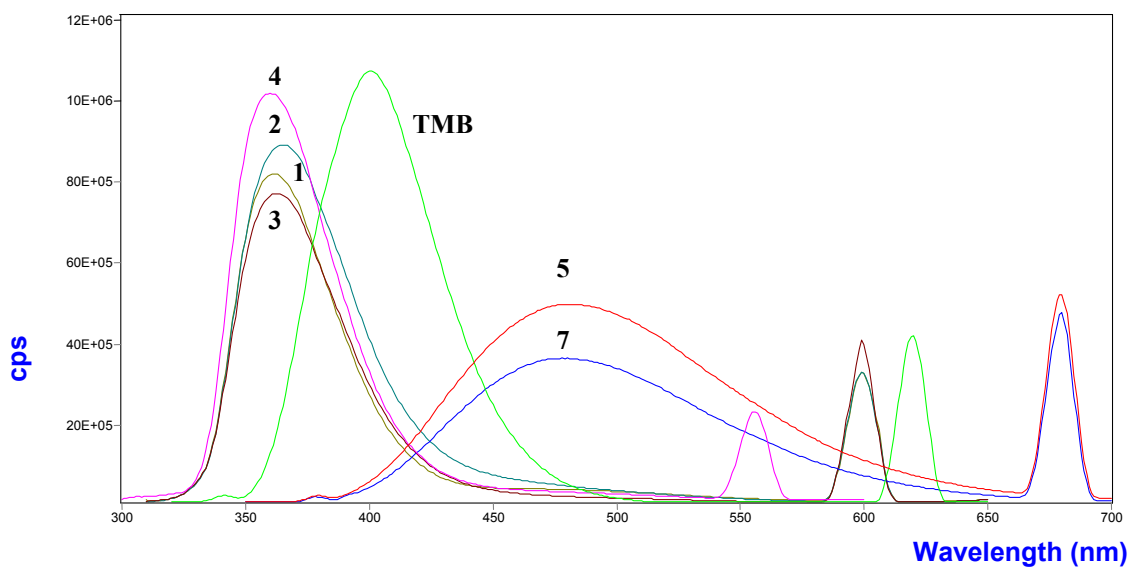

Fluorescence spectra of **1**, **2**, **3**, **4**, **5**, **7** and **TMB** in  $\text{CH}_3\text{CN}$  at  $20^\circ\text{C}$ .  $\lambda_{\text{exc}}=300$  nm (**1**, **2**, **3**),  $\lambda_{\text{exc}}=278$  nm (**4**),  $\lambda_{\text{exc}}=340$  nm (**5**, **7**), and  $\lambda_{\text{exc}}=310$  nm (**TMB**).

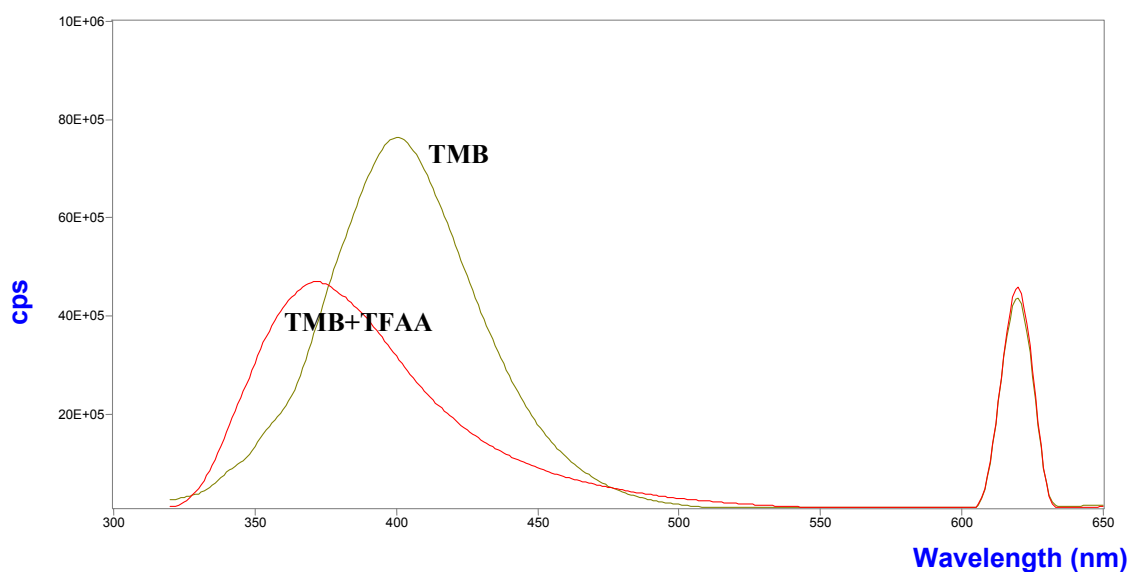

Fluorescence spectra of **TMB** under different acid-base conditions at  $20^\circ\text{C}$ ,  $\lambda_{\text{exc}}=310$  nm. Initial concentration of ligand was  $6.51 \times 10^{-7}$  M in  $\text{CH}_3\text{CN}$ . **TMB**: TMB in pure  $\text{CH}_3\text{CN}$ . **TMB + TFAA**: TMB in a large excess of trifluoroacetic acid in  $\text{CH}_3\text{CN}$ .

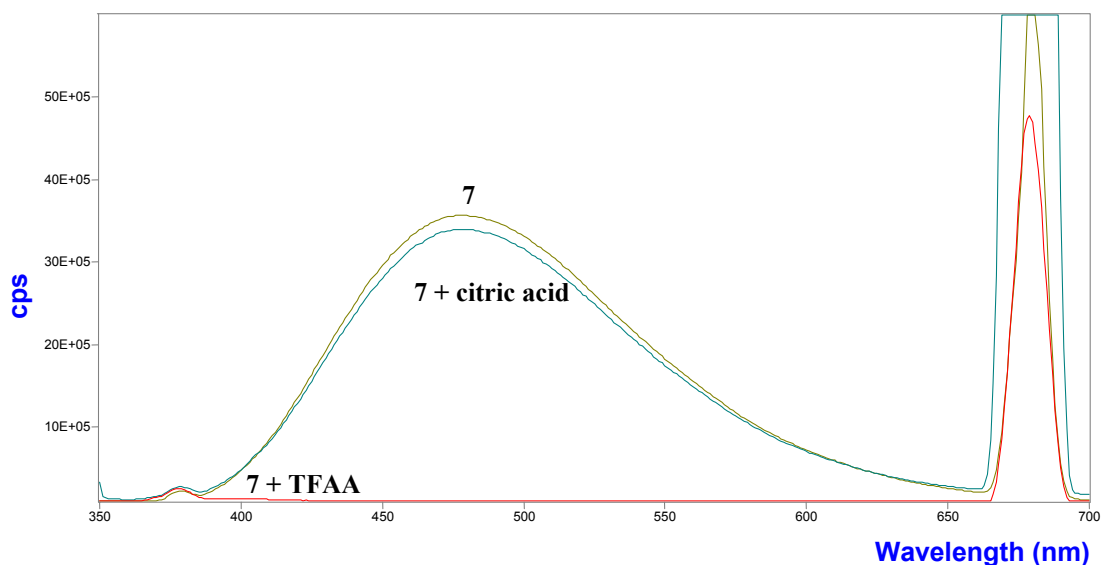

Fluorescence spectra of **7** under different acid-base conditions at 20°C,  $\lambda_{\text{exc}}=340$  nm and initial concentration of ligand of  $4.42 \times 10^{-6}$  M in  $\text{CH}_3\text{CN}$ . **7**: ligand in pure  $\text{CH}_3\text{CN}$  or in  $1.54 \times 10^{-4}$  M of Tetramethylammonium hydroxide in  $\text{CH}_3\text{CN}$ . **7 + citric acid**: ligand in  $1.21 \times 10^{-4}$  M of citric acid in  $\text{CH}_3\text{CN}$ . **7 + TFAA**: ligand in a large excess of trifluoroacetic acid in  $\text{CH}_3\text{CN}$ .

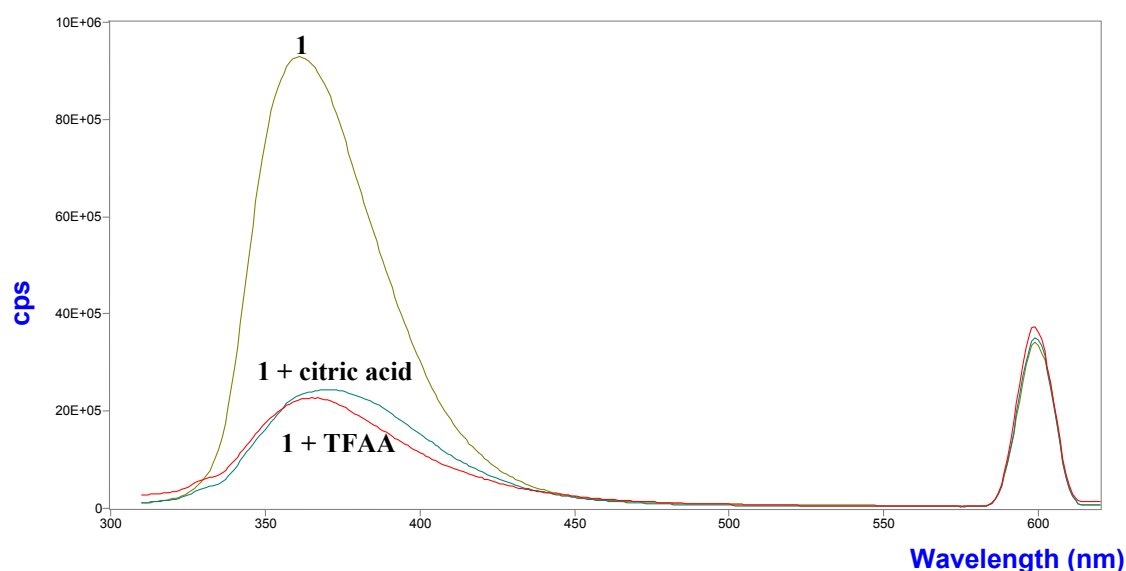

Fluorescence spectra of **1** under different acid-base conditions at 20°C,  $\lambda_{\text{exc}}=300$  nm and initial concentration of ligand of  $5.88 \times 10^{-6}$  M in  $\text{CH}_3\text{CN}$ . **1**: ligand in pure  $\text{CH}_3\text{CN}$  or in  $1.31 \times 10^{-4}$  M of Tetramethylammonium hydroxide in  $\text{CH}_3\text{CN}$ . **1 + citric acid**: ligand in

$3.27 \times 10^{-4}$  M of citric acid in  $\text{CH}_3\text{CN}$ . **1** + **TFAA**: ligand in a large excess of trifluoroacetic acid in  $\text{CH}_3\text{CN}$ .

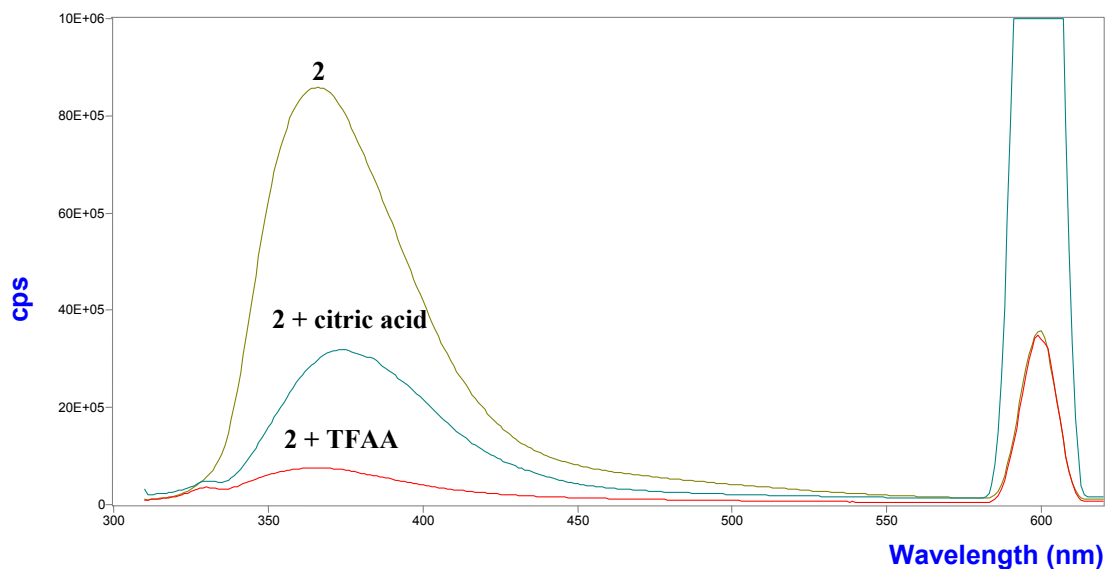

Fluorescence spectra of **2** under different acid-base conditions at  $20^\circ\text{C}$ ,  $\lambda_{\text{exc}}=300$  nm and initial concentration of ligand of  $7.34 \times 10^{-6}$  M in  $\text{CH}_3\text{CN}$ . **2**: ligand in pure  $\text{CH}_3\text{CN}$  or in  $3.85 \times 10^{-4}$  M of Tetramethylammonium hydroxide in  $\text{CH}_3\text{CN}$ . **2** + **citric acid**: ligand in  $1.66 \times 10^{-4}$  M of citric acid in  $\text{CH}_3\text{CN}$ . **2** + **TFAA**: ligand in a large excess of trifluoroacetic acid in  $\text{CH}_3\text{CN}$ .

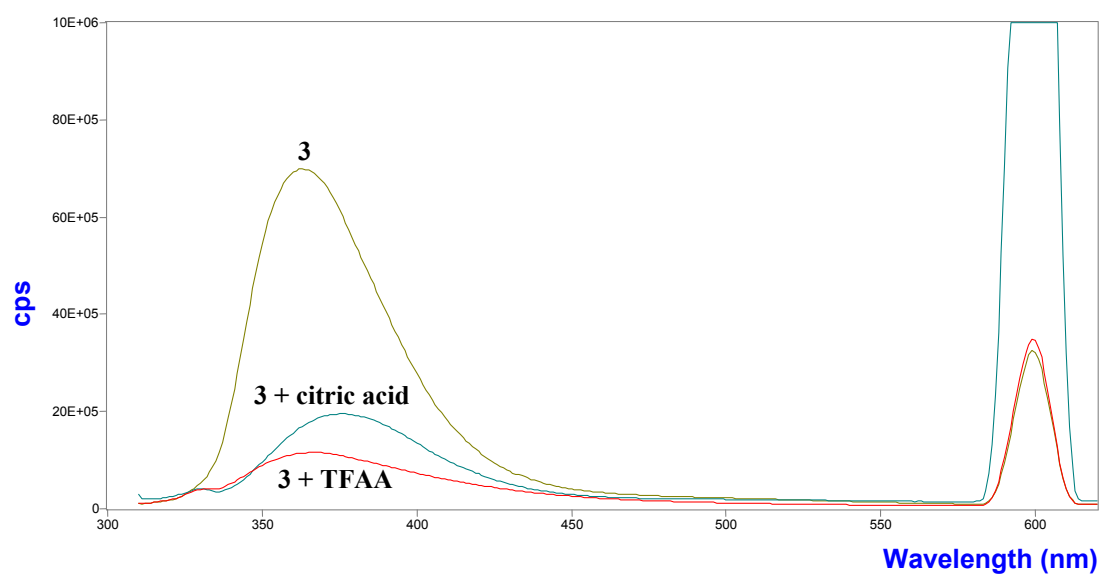

Fluorescence spectra of **3** under different acid-base conditions at 20°C,  $\lambda_{\text{exc}}=300$  nm and initial concentration of ligand of  $5.13 \times 10^{-6}$  M in  $\text{CH}_3\text{CN}$ . **3**: ligand in pure  $\text{CH}_3\text{CN}$  or in  $5.49 \times 10^{-4}$  M of Tetramethylammonium hydroxide in  $\text{CH}_3\text{CN}$ . **3 + citric acid**: ligand in  $1.87 \times 10^{-4}$  M of citric acid in  $\text{CH}_3\text{CN}$ . **3 + TFAA**: ligand in a large excess of trifluoroacetic acid in  $\text{CH}_3\text{CN}$ .

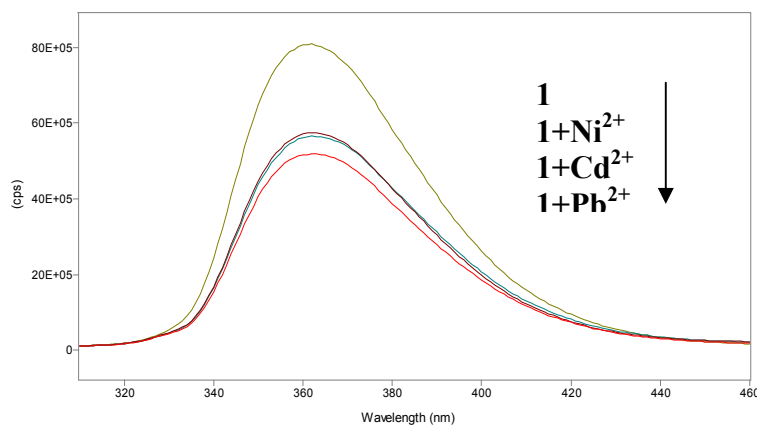

Fluorescence spectra of **1** after addition of *ca.* 4.5 equivalents of  $\text{Ni}^{2+}$ ,  $\text{Cd}^{2+}$  and  $\text{Pb}^{2+}$  at 20°C,  $\lambda_{\text{exc}}=300$  nm. Initial concentration of ligand was *ca.*  $5.6 \times 10^{-6}$  M in  $\text{CH}_3\text{CN}$ .

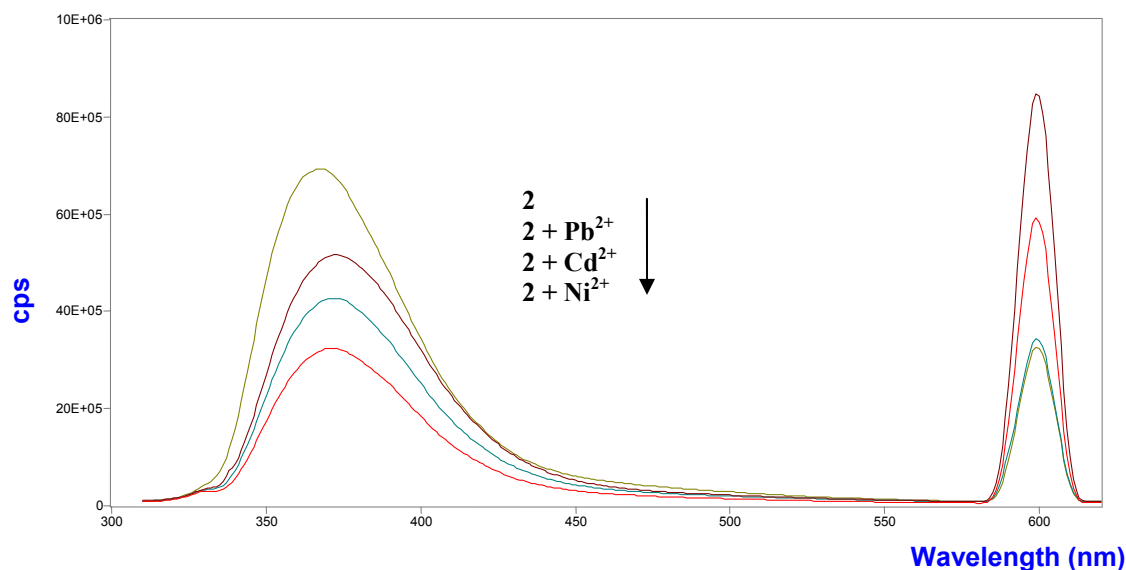

Fluorescence spectra of **2** after addition of *ca.* 4.5 equivalents of  $\text{Ni}^{2+}$ ,  $\text{Cd}^{2+}$  and  $\text{Pb}^{2+}$  at 20°C,  $\lambda_{\text{exc}}=300$  nm. Initial concentration of ligand was *ca.*  $6.1 \times 10^{-6}$  M in  $\text{CH}_3\text{CN}$ .

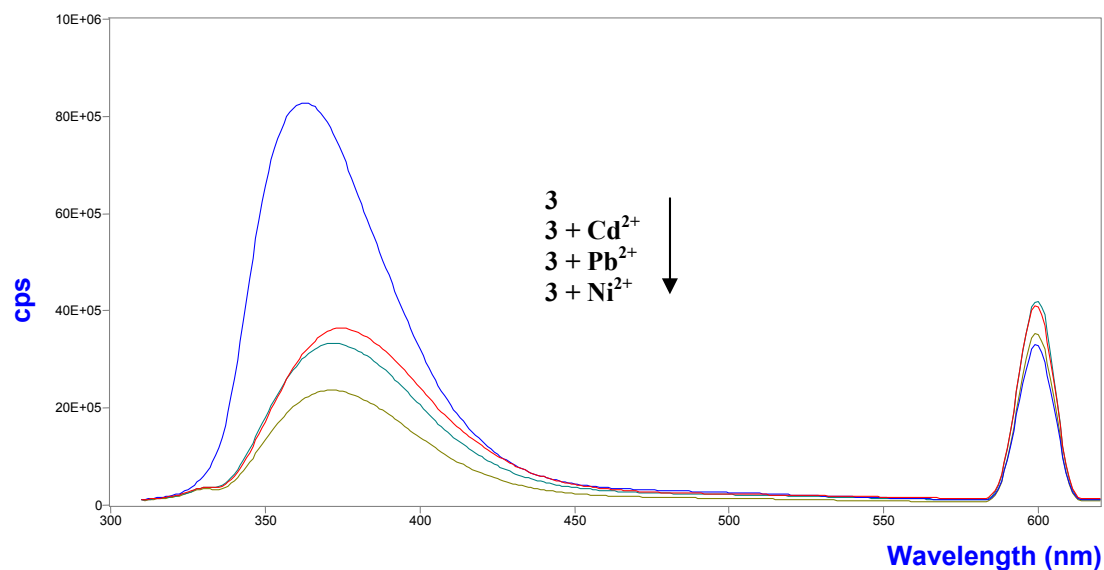

Fluorescence spectra of **3** after addition of *ca.* 5.5 equivalents of Ni<sup>2+</sup>, Cd<sup>2+</sup> and Pb<sup>2+</sup> at 20°C,  $\lambda_{\text{exc}}$ =300 nm. Initial concentration of ligand was *ca.*  $5.8 \times 10^{-6}$  M in CH<sub>3</sub>CN.

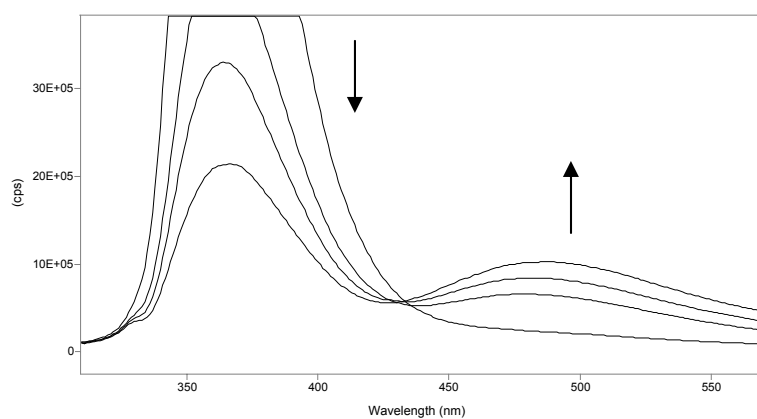

**Fig.4** Fluorescence spectra of **1** after addition of Cu<sup>2+</sup> at 20°C,  $\lambda_{\text{exc}}$ =300 nm. Initial concentration of ligand was  $5.71 \times 10^{-6}$  M in CH<sub>3</sub>CN. Spectra correspond to additions of 0, 0.70, 1.40 and 2.10 eq. of Cu<sup>2+</sup> respectively.

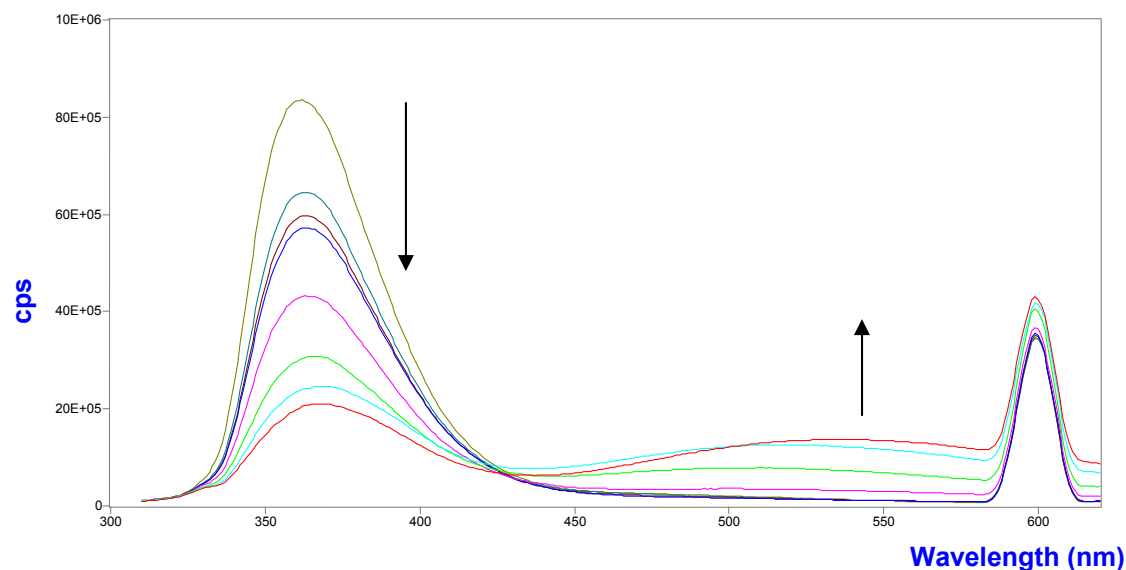

Fluorescence spectra of **1** after addition of Zn<sup>2+</sup> at 20°C,  $\lambda_{\text{exc}}=300$  nm. Initial concentration of ligand was  $5.65 \times 10^{-6}$  M in CH<sub>3</sub>CN. Spectra correspond to additions of 0, 0.71, 1.42, 2.12, 5.66, 9.20, 12.74, 16.27 and 23.22 eq. of Zn<sup>2+</sup> respectively.

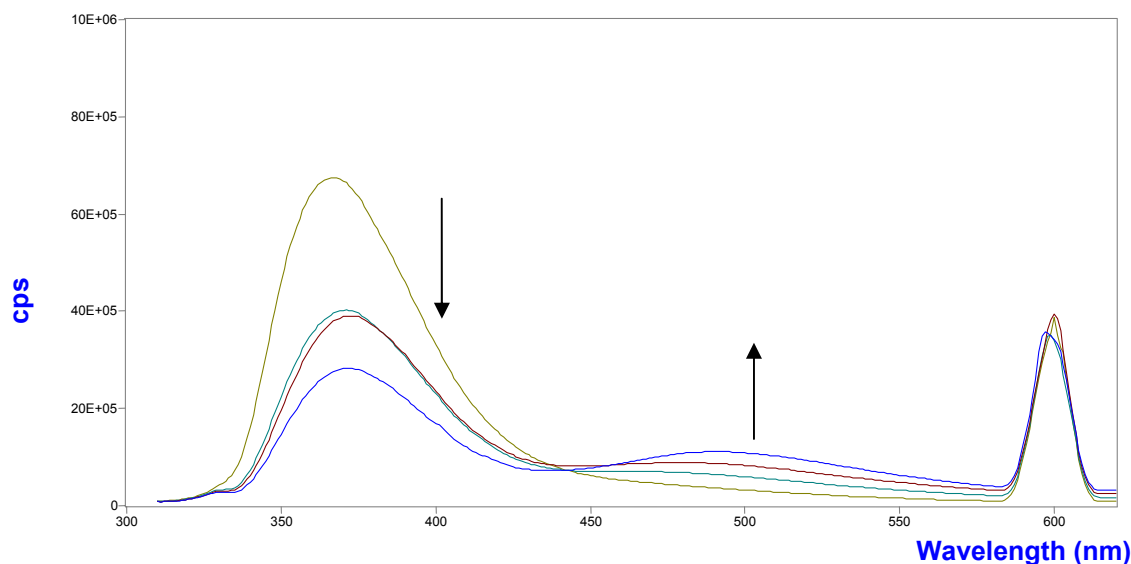

Fluorescence spectra of **2** after addition of Cu<sup>2+</sup> at 20°C,  $\lambda_{\text{exc}}=300$  nm. Initial concentration of ligand was  $5.46 \times 10^{-6}$  M in CH<sub>3</sub>CN. Spectra correspond to additions of 0, 0.73, 1.46 and 2.93 eq. of Cu<sup>2+</sup> respectively.

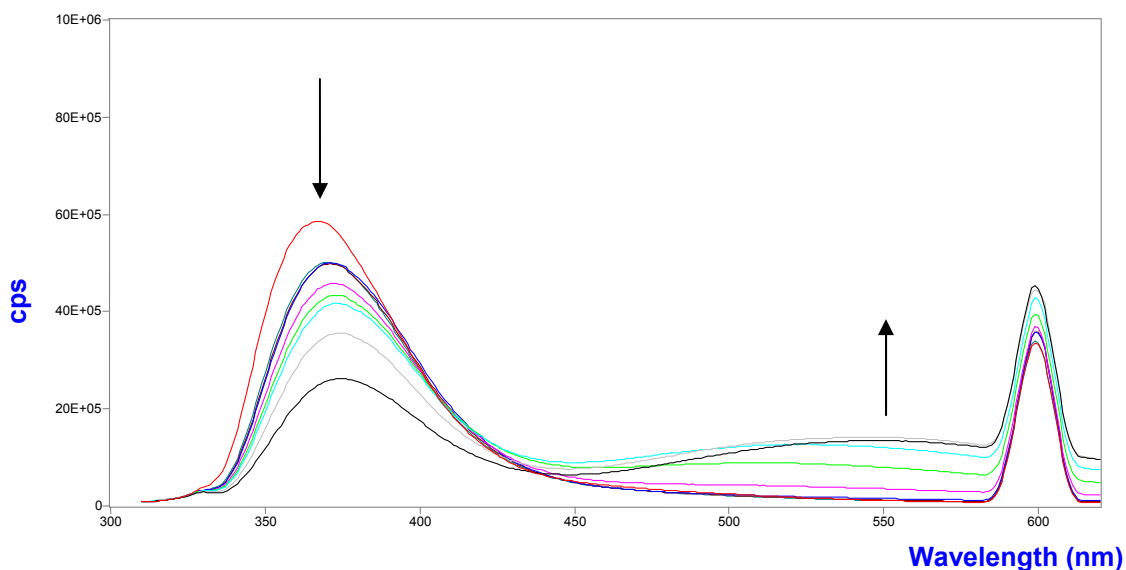

Fluorescence spectra of **2** after addition of Zn<sup>2+</sup> at 20°C,  $\lambda_{\text{exc}}=300$  nm. Initial concentration of ligand was  $5.25 \times 10^{-6}$  M in CH<sub>3</sub>CN. Spectra correspond to additions of 0, 0.76, 1.52, 3.04, 6.85, 10.65, 14.45, 18.25 and 22.05 eq. of Zn<sup>2+</sup> respectively.

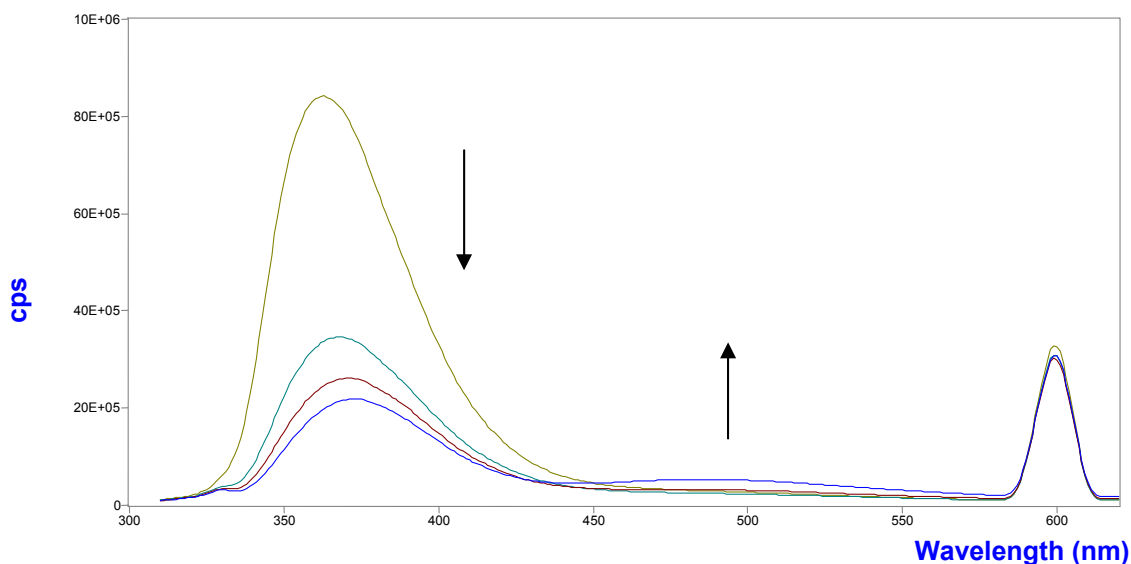

Fluorescence spectra of **3** after addition of Cu<sup>2+</sup> at 20°C,  $\lambda_{\text{exc}}=300$  nm. Initial concentration of ligand was  $5.74 \times 10^{-6}$  M in CH<sub>3</sub>CN. Spectra correspond to additions of 0, 0.70, 1.39 and 2.09 eq. of Cu<sup>2+</sup> respectively.

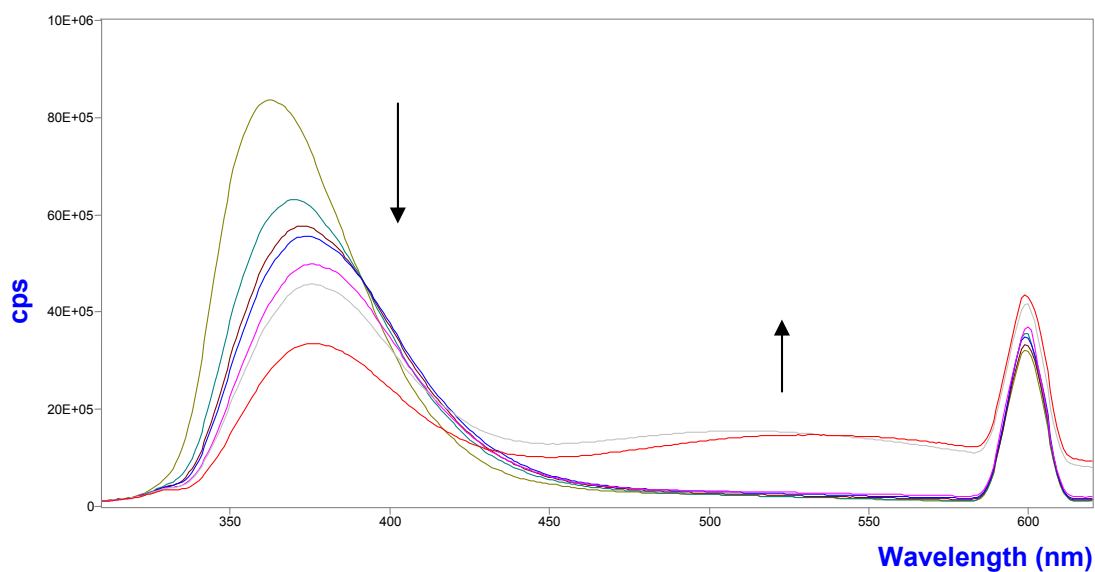

Fluorescence spectra of **3** after addition of Zn<sup>2+</sup> at 20°C,  $\lambda_{\text{exc}}=300$  nm. Initial concentration of ligand was  $5.52 \times 10^{-6}$  M in CH<sub>3</sub>CN. Spectra correspond to additions of 0, 0.68, 1.37, 2.05, 5.47, 15.72 and 22.55 eq. of Zn<sup>2+</sup> respectively.

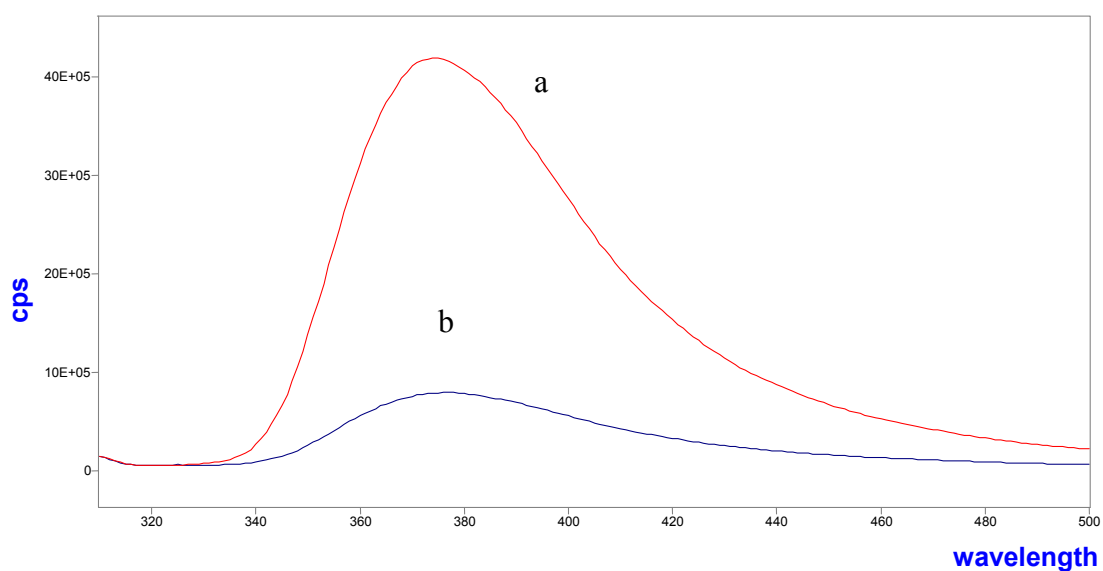

Fluorescence spectra of **1** at different pH at 20°C,  $\lambda_{\text{exc}}=278$  nm. Concentration of ligand was ca.  $1 \times 10^{-5}$  M in water. **a)** pH = 9.45. **b)** pH = 7.66.



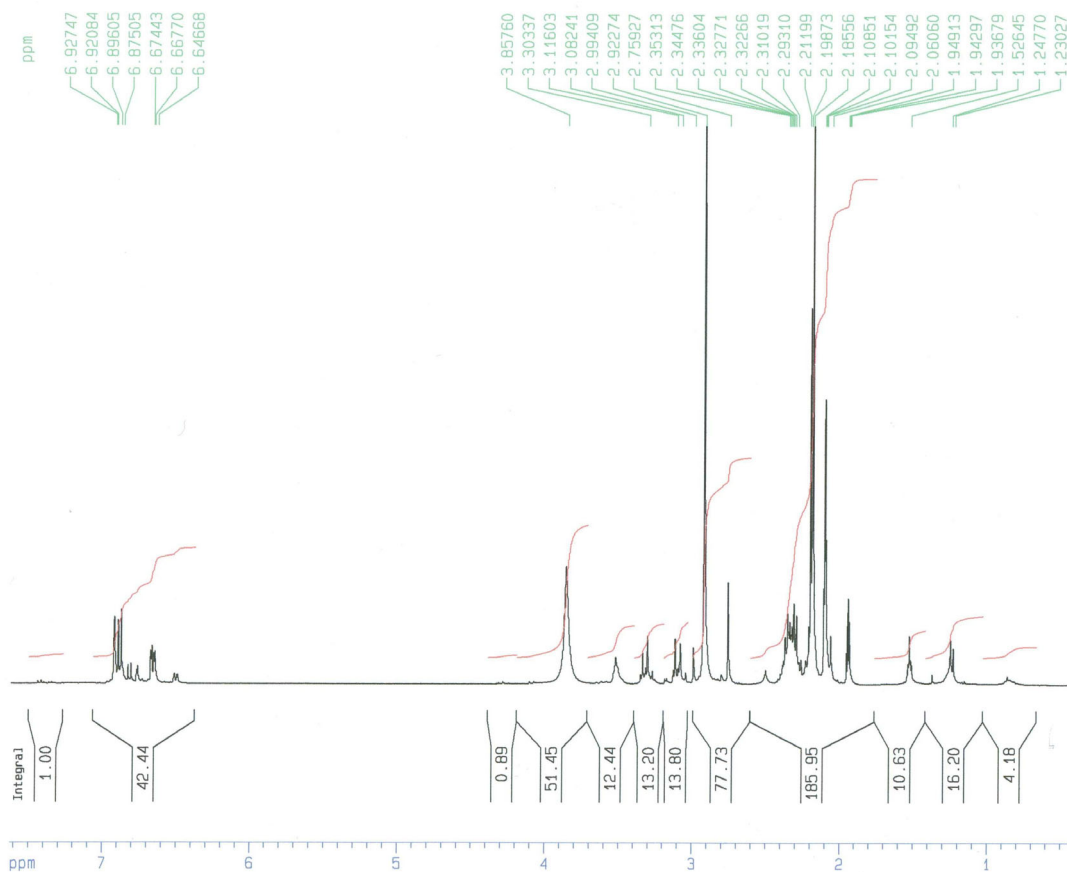

<sup>1</sup>H NMR of ligand **1**, in CD<sub>3</sub>CN, after addition of excess K<sub>2</sub>CO<sub>3</sub>.

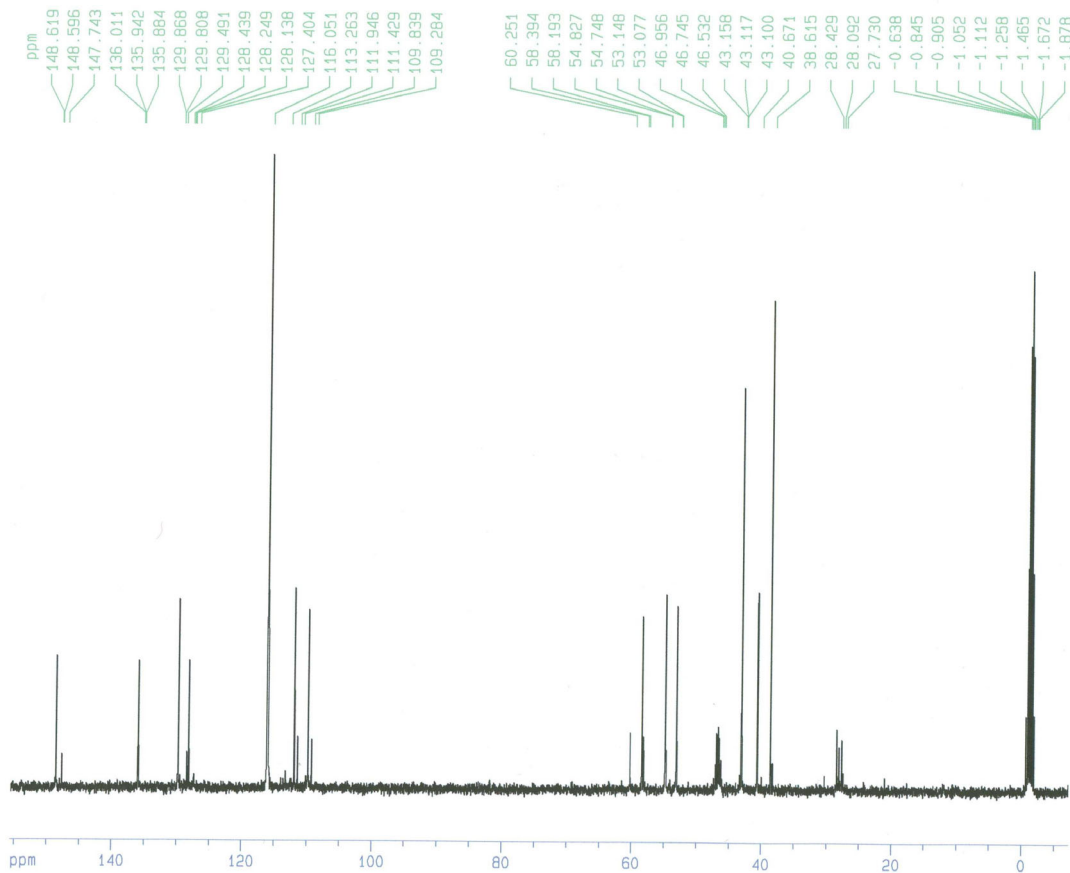

<sup>13</sup>C NMR of ligand **1**, in CD<sub>3</sub>CN, after addition of excess K<sub>2</sub>CO<sub>3</sub>.

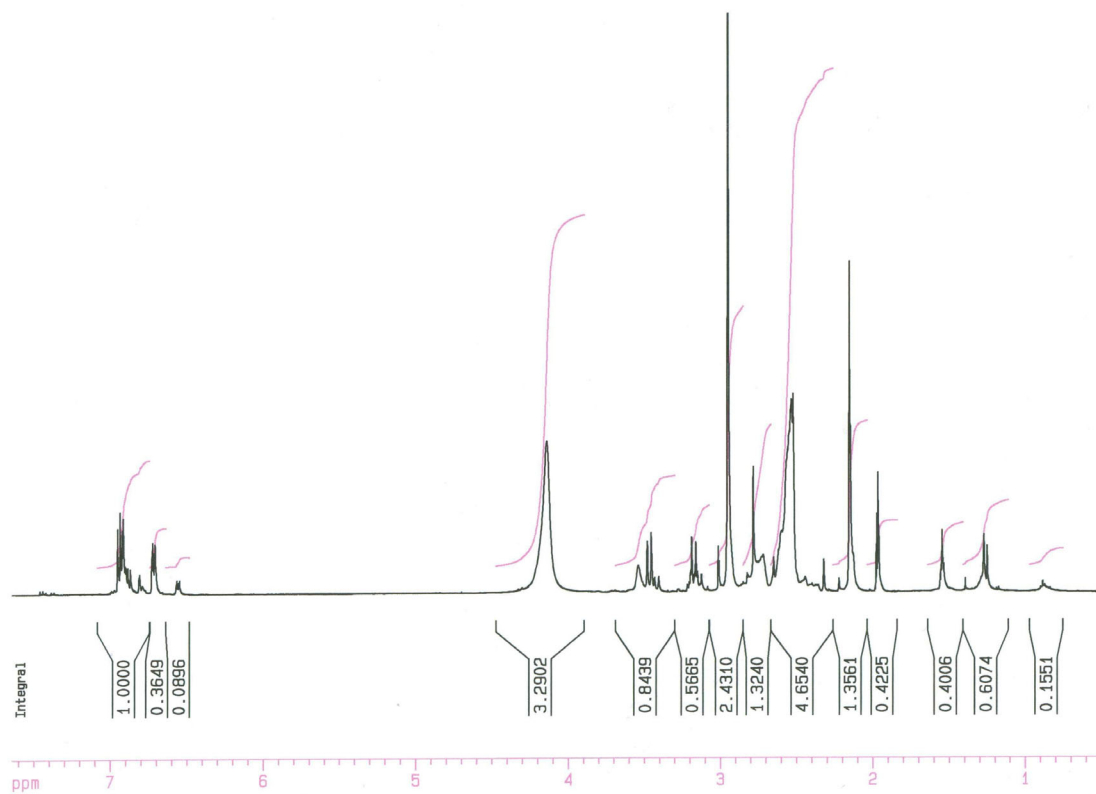

<sup>1</sup>H NMR of ligand **1**, in CD<sub>3</sub>CN, after addition of excess citric acid.

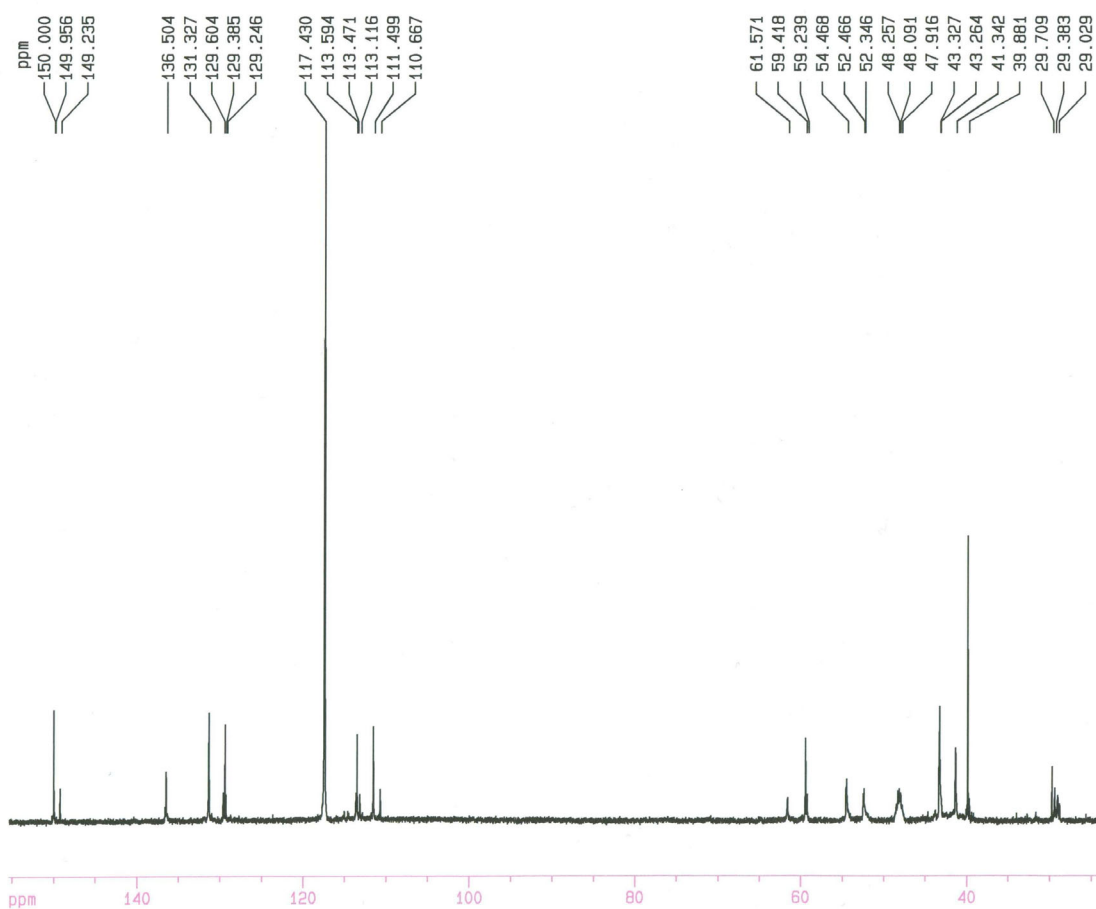

<sup>13</sup>C NMR of ligand **1**, in CD<sub>3</sub>CN, after addition of excess citric acid.

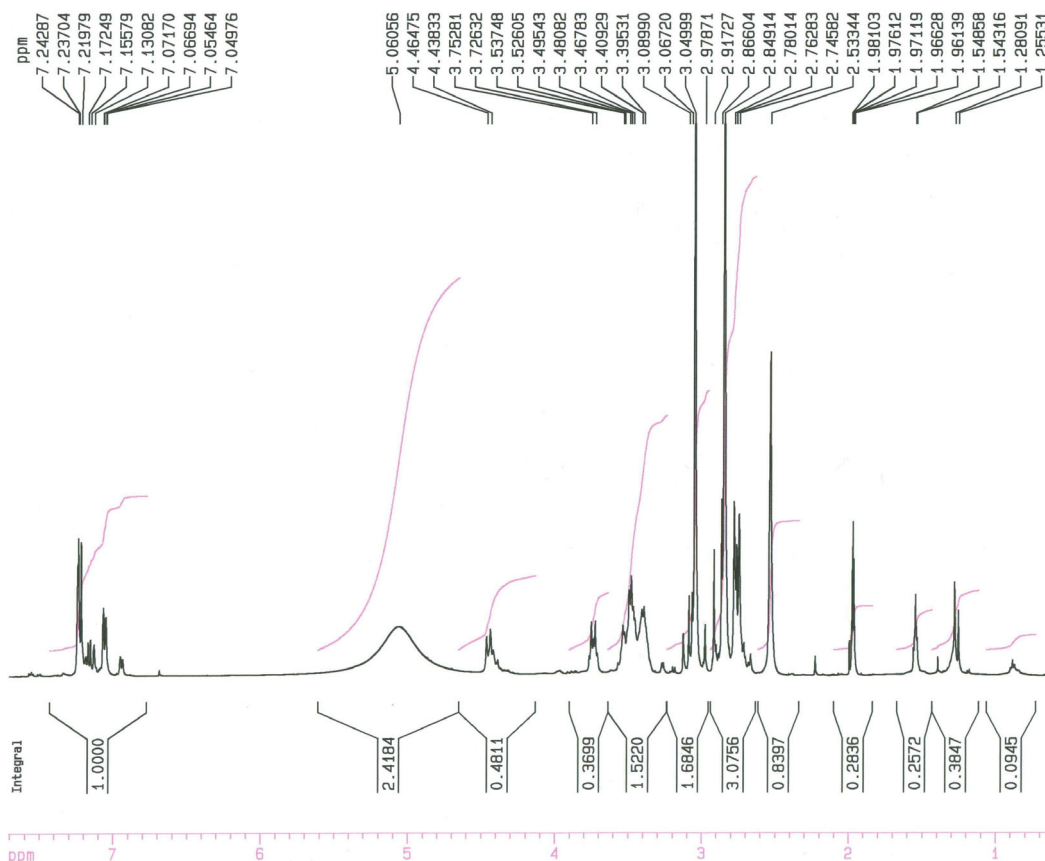

<sup>1</sup>H NMR of ligand **1**, in CD<sub>3</sub>CN, after addition of excess TFAA.

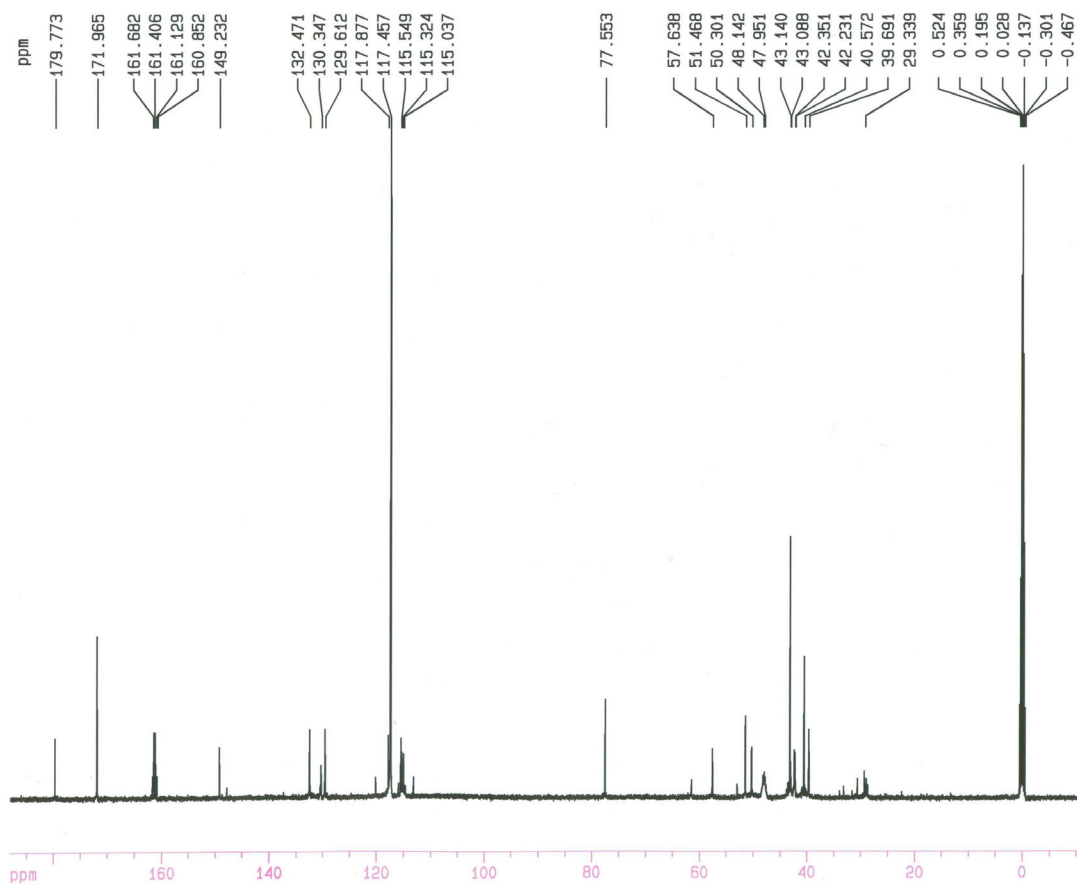

<sup>13</sup>C NMR of ligand **1**, in CD<sub>3</sub>CN, after addition of excess TFAA.
